# ***N*<sup>6</sup>-methyladenosine in poly(A) tails stabilize VSG transcripts**

Idalio J. Viegas<sup>1</sup>, Juan Pereira de Macedo<sup>1</sup>, Mariana De Niz<sup>1</sup>, João A. Rodrigues<sup>2</sup>,  
Francisco Aresta-Branco<sup>3,4</sup>, Samie R. Jaffrey<sup>5</sup>, Luisa M. Figueiredo<sup>1\*</sup>

1. Instituto de Medicina Molecular – João Lobo Antunes, Faculdade de Medicina, Universidade de Lisboa, Lisboa 1649-028, Portugal

2. Clarify Analytical, Rua dos Mercadores 128A, 7000-872 Évora, Portugal

3. Division of Immune Diversity, German Cancer Research Center, Im Neuenheimer Feld 280, 69120, Heidelberg, Germany

4. Division of Structural Biology of Infection and Immunity, German Cancer Research Center, Im Neuenheimer Feld 280, 69120, Heidelberg, Germany

5. Department of Pharmacology, Weill Medical College, Cornell University, New York, NY, USA

\*corresponding address: [lmf@medicina.ulisboa.pt](mailto:lmf@medicina.ulisboa.pt)

## **Keywords**

*N*<sup>6</sup>-methyladenosine, m<sup>6</sup>A, RNA stability, RNA modification, trypanosomes, VSG, antigenic variation, poly(A) tail

## **Summary**

RNA modifications are important regulators of gene expression. In *Trypanosoma brucei*, transcription is polycistronic and thus most regulation happens post-transcriptionally. *N*<sup>6</sup>-methyladenosine (m<sup>6</sup>A) has been detected in this parasite, but its function remains unknown. Here we show that ~50% of the m<sup>6</sup>A is located in the poly(A) tail of the monoallelically expressed Variant Surface Glycoprotein (VSG) transcript. m<sup>6</sup>A residues are removed from the VSG poly(A) tail prior to deadenylation and mRNA degradation. Using genetic tools, we identified a 16-mer motif in the 3'UTR of VSG that acts as a cis-acting motif required for inclusion of m<sup>6</sup>A in the poly(A) tail. Removal of this motif from the VSG 3' UTR results in poly(A) tails lacking m<sup>6</sup>A, rapid deadenylation and mRNA degradation. To our knowledge this is the first identification of an RNA modification in the poly(A) tail of any eukaryote, uncovering a novel post-transcriptional mechanism of gene regulation.

## 40 Introduction

41 *Trypanosoma brucei* (*T. brucei*) is a protozoan unicellular parasite that  
42 causes lethal diseases in sub-Saharan Africa: sleeping sickness in humans and  
43 nagana in cattle<sup>1</sup>. In humans, the infection can last several months or years  
44 mostly because *T. brucei* escapes the immune system by periodically changing  
45 its variant surface glycoprotein (*VSG*)<sup>2</sup>. The *T. brucei* genome contains around  
46 2000 antigenically distinct *VSG* genes, but only one *VSG* gene is actively  
47 transcribed at a given time. Transcriptionally silent *VSG* genes are switched on  
48 by homologous recombination into the BES or by transcriptional activation of a  
49 new BES<sup>2</sup>, resulting in parasites covered by ~10 million identical copies of the  
50 *VSG* protein<sup>3</sup>.

51  
52 *VSG* is essential for the survival of bloodstream form parasites. *VSG* is not  
53 only one of the most abundant proteins in *T. brucei*, but it is also the most  
54 abundant mRNA in bloodstream forms (4-11% of total mRNA)<sup>4,5</sup>. *VSG* mRNA  
55 abundance is a consequence of its unusual transcription by RNA polymerase I  
56 and its prolonged stability. The half-life of *VSG* mRNA has been estimated to  
57 range from 90-270 min, contrasting with the 12 min, on average, for other  
58 transcripts<sup>6</sup>. The basis for its unusually high stability is not known. It is thought to  
59 derive from the *VSG* 3'UTR, which contains two conserved motifs, a 9-mer and  
60 a 16-mer motif, found immediately upstream of the poly(A) tail. Mutational studies  
61 have shown that the 16-mer conserved motif is essential for *VSG* mRNA high  
62 abundance and stability<sup>7</sup>, even though its underlying mechanism is unknown.

63 *VSG* expression is highly regulated when the bloodstream form parasites  
64 undergo differentiation to the procyclic forms that proliferate in the insect vector<sup>8</sup>.  
65 The BES becomes transcriptionally silenced and *VSG* mRNA becomes  
66 unstable<sup>9</sup>, which results in rapid loss of *VSG* mRNA and replacement of the *VSG*  
67 coat protein by other surface proteins (reviewed in<sup>10</sup>). The mechanism by which  
68 *VSG* mRNA becomes unstable during differentiation remain unknown. The  
69 surface changes are accompanied by additional metabolic and morphological  
70 adaptations, which allow procyclic forms to survive in a different environment in  
71 the insect host<sup>10</sup>.

72 RNA modifications have been recently identified as important means of  
73 regulating gene expression. The most abundant internal modified nucleotide in  
74 eukaryotic mRNA is *N*<sup>6</sup>-methyladenosine (*m*<sup>6</sup>*A*)<sup>11,12</sup>, which is widespread across  
75 the human and mouse transcriptomes and is often found near stop codons and  
76 the 3' untranslated regions of the mRNA encoded by multiple genes<sup>13,14</sup>. *m*<sup>6</sup>*A* is  
77 synthesized by a methyltransferase complex whose catalytic subunit, METTL3,  
78 methylates adenosine in a specific consensus motif. Demethylases responsible  
79 for removing *m*<sup>6</sup>*A* from mRNA have also been identified. *m*<sup>6</sup>*A* affects several  
80 aspects of RNA biology, for instance contributing to mRNA stability, mRNA  
81 translation, or affecting alternative polyadenylation site selection (reviewed in<sup>15</sup>).

82 Here we show that *N*<sup>6</sup>-methyladenosine is an RNA modification enriched  
83 in *T. brucei* mRNA. Importantly, this study revealed that *m*<sup>6</sup>*A* is present in mRNA  
84 poly(A) tails, and half of *m*<sup>6</sup>*A* is located in only one transcript (*VSG* mRNA). We  
85 identified a cis-acting element required for inclusion of *m*<sup>6</sup>*A* at the *VSG* poly(A)  
86 tail and, by genetically manipulating this motif, we showed that *m*<sup>6</sup>*A* blocks  
87 poly(A) deadenylation, hence promoting *VSG* mRNA stability. We provide the first

88 evidence that poly(A) tails of mRNA can be methylated in eukaryotes, playing a  
89 regulatory role in the control of gene expression.

90

## 91 **Results**

92

### 93 **m<sup>6</sup>A is present in *T. brucei* messenger RNA**

94

95 To investigate if *T. brucei* RNA harbours modified nucleosides that could  
96 play a role in gene regulation, we used liquid chromatography-tandem mass  
97 spectrometry (LC-MS/MS) to detect possible modifications of RNA nucleosides.  
98 Thirty seven possible modified nucleosides were found in total RNA (Table S1),  
99 most of which had been previously detected in *T. brucei* RNA including Am, which  
100 is found in the mRNA cap structure, and m<sup>3</sup>C, m<sup>5</sup>C and Gm in tRNA and rRNA<sup>16-</sup>  
101 <sup>18</sup>. Mass-spectrometry analysis of mRNA revealed a clear peak that  
102 corresponded to m<sup>6</sup>A. Given the importance of this modification for RNA  
103 metabolism in other eukaryotes, we focused on this specific modification in *T.*  
104 *brucei*.

105 First, we tested if m<sup>6</sup>A was mainly present in mRNA, or if it was present in  
106 other type of RNA molecules (rRNA, tRNA and other non-coding RNAs). We also  
107 compared two different stages of the parasite life cycle, the mammalian  
108 bloodstream and the insect procyclic forms. An m<sup>6</sup>A nucleoside standard was  
109 used as a control. The chromatograms of the poly(A)-enriched fraction (mRNA)  
110 revealed a single peak corresponding to the 282→150 mass transition and an  
111 elution time of 10 min (Fig. 1A), confirming it represents m<sup>6</sup>A. The chromatograms  
112 of total RNA and poly(A)-depleted samples also contained a peak with an  
113 identical mass transition, but the elution time was much earlier (6.5 min), which  
114 likely reflects N<sup>1</sup>-methyladenosine (m<sup>1</sup>A), a modification with the same mass and  
115 earlier elution times, and is commonly found in rRNAs and tRNAs<sup>19,20</sup>. The m<sup>6</sup>A  
116 peak in poly(A)-depleted RNA was barely detectable, indicating that most (if not  
117 all) m<sup>6</sup>A is present in mRNA and absent from rRNA and tRNAs. Similar results  
118 were obtained in RNA fractions obtained from the procyclic form insect stage  
119 (Extended Data Fig. S1A).

120

121 The m<sup>6</sup>A standard allowed us to quantify the abundance of m<sup>6</sup>A in both  
122 stages of the life cycle (Extended Data Fig. S1B). As expected, the levels are  
123 very low in total and poly(A)-depleted fractions. In contrast, in both bloodstream  
124 and procyclic forms mRNA fractions, m<sup>6</sup>A represents 0.06% of total adenines in  
125 mRNA (Fig. 1B). In other words, 6 in 10,000 adenosines contain a methyl group  
126 at position 6. This proportion is lower than in mammalian cells (0.1-0.4%,<sup>11,12</sup>).

127

128

129

130

131

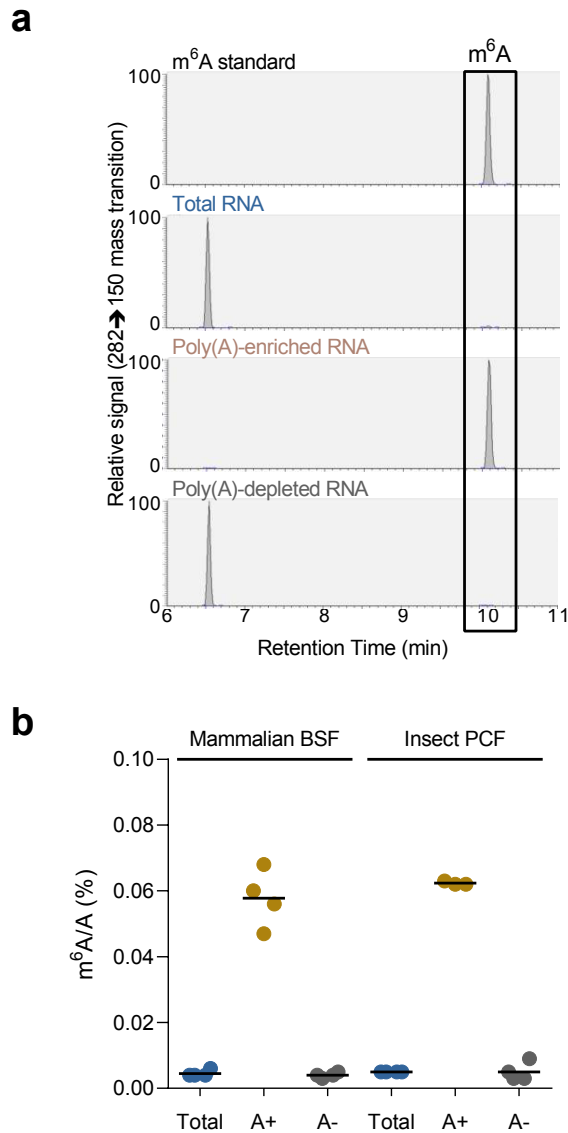

**Figure 1.  $m^6A$  is present in *T. brucei* mRNA in both insect and mammalian stages of the life cycle.**

**a.** Chromatograms obtained based on an LC-MS/MS analysis of a  $m^6A$  standard and three RNA samples of *T. brucei* mammalian stages (BSF): total RNA, RNA enriched with oligo(dT)-beads (i.e., poly(A)-enriched RNA) and RNA that did not bind poly(T)-beads (i.e., poly(A)-depleted RNA). RNA was hydrolyzed and dephosphorylated and individual nucleosides were resolved by HPLC.  $m^6A$  was readily detected in the poly(A)-enriched RNA. Another peak eluting at ~6.6 min, corresponding to the tRNA and rRNA-enriched nucleotide  $m^1A$ , was detected in the poly(A)-depleted and total RNA samples. Identical analysis was performed in RNA from the insect life-cycle stage (PCF) – Fig. S1A. **b.** Levels of  $m^6A$  detected by LC-MS/MS in the RNA samples indicated in panel (A) and quantified using the standard curve in Fig. S1B.

(see also Extended Data Fig. S1)

161 **m<sup>6</sup>A is enriched in the VSG poly(A) tail**

162

163 During their life cycle, parasites need to adapt to living in different  
164 environments. The most recent studies have shown that around 30% of  
165 transcripts and around 33-40% of proteins are differentially expressed between  
166 these two life cycle stages<sup>21,22</sup>. It is possible that m<sup>6</sup>A is not equally distributed  
167 qualitatively and quantitatively in the transcripts of the two stages of the life cycle.  
168 To test this hypothesis, performed immunoblotting with an antibody that  
169 recognizes m<sup>6</sup>A. This antibody specifically recognizes m<sup>6</sup>A with minimal cross-  
170 reaction with unmodified adenosine or m<sup>1</sup>A (Extended Data Fig. S2). Mouse liver  
171 total RNA was used as a control. As expected<sup>13</sup>, the immunoblotting of liver total  
172 RNA revealed a smear in the entire lane, indicating that multiple RNA molecules  
173 of different sizes harbour m<sup>6</sup>A (Fig. 2A).

174 Next, we examined m<sup>6</sup>A in total RNA, poly(A)-enriched and poly(A)-  
175 depleted RNAs derived from bloodstream and procyclic forms (Fig. 2A).  
176 Consistent with the results obtained by LC-MS/MS, the poly(A)-depleted fraction  
177 showed a weak m<sup>6</sup>A signal, revealing that m<sup>6</sup>A is absent or below detection levels  
178 in rRNAs and tRNAs. In contrast, an m<sup>6</sup>A-positive smear was detected in poly(A)-  
179 enriched fraction both in bloodstream and procyclic forms, confirming that m<sup>6</sup>A is  
180 present in multiple mRNA molecules in both stages of the life cycle. Strikingly,  
181 however, the sample of bloodstream forms revealed an intense band of around  
182 1.8 kb. This band accounts for ~50% of the m<sup>6</sup>A signal intensity in the lane (Fig.  
183 2B), suggesting that m<sup>6</sup>A in bloodstream forms is highly enriched in one type or  
184 several similarly sized types of transcripts.

185 The most abundant transcript in bloodstream forms is the *VSG*, which  
186 accounts for ~5% of the total mRNA<sup>5</sup>. To test if the specific band is *VSG*, we  
187 repeated the immunoblot assay but site-selectively cleaved the *VSG* transcript  
188 with Ribonuclease H (RNase H) and monitored the mobility of the m<sup>6</sup>A band.  
189 Poly(A) RNA was incubated with DNA oligonucleotides that annealed at different  
190 sites along the length of the *VSG* transcript. RNase H digestion of the RNA:DNA  
191 hybrids result in fragments of predicted sizes (Fig. 2C-D). If the *VSG* transcript is  
192 the band with the intense m<sup>6</sup>A signal, the band detected by immunoblotting would  
193 “shift” to one or two of the fragments of smaller size.

194

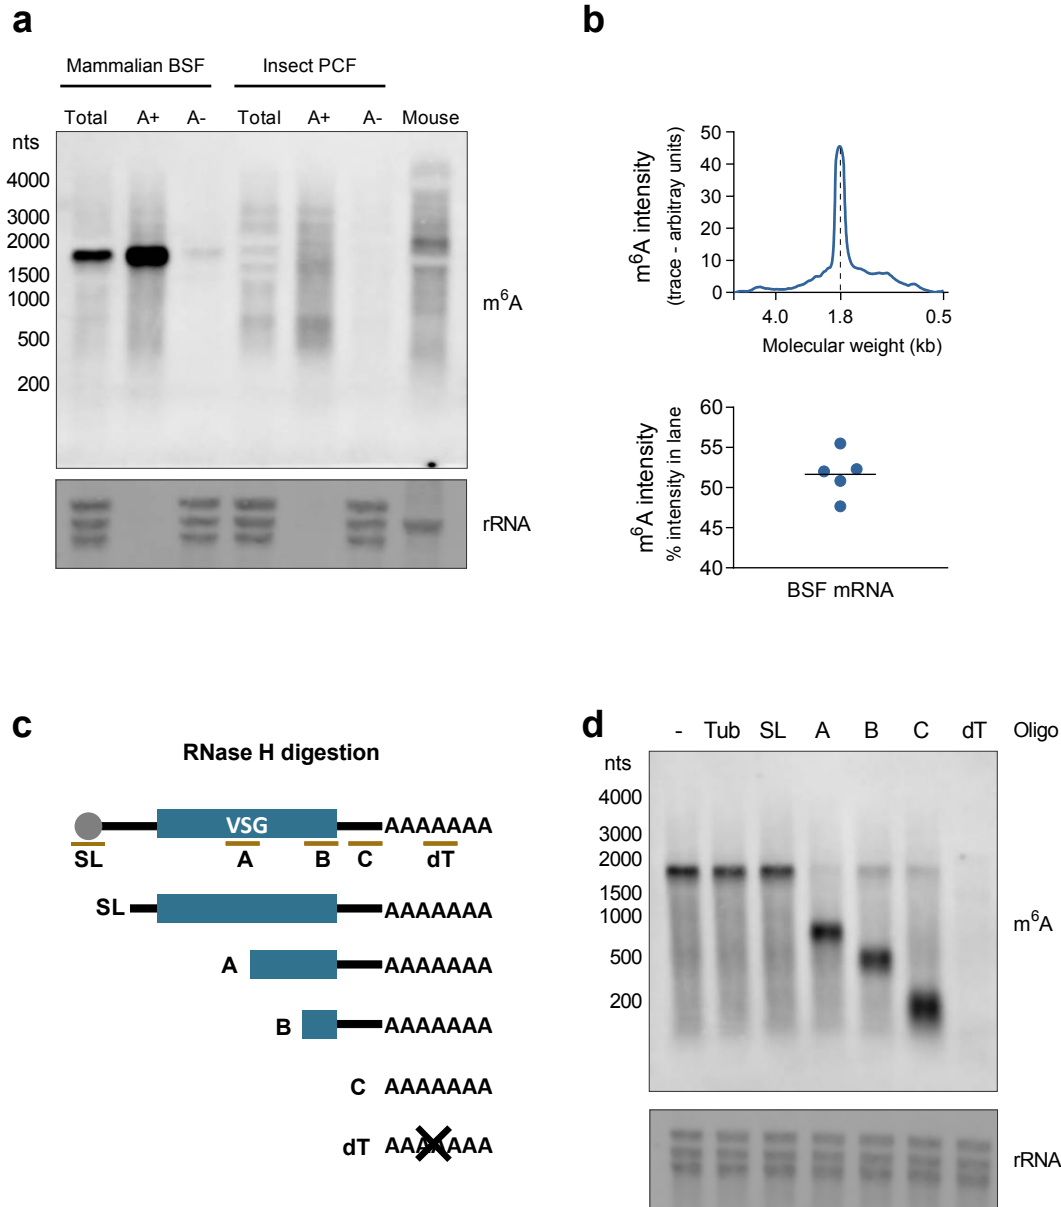

195  
196  
197  
198  
199  
200  
201  
202  
203  
204  
205  
206  
207  
208  
209  
210  
211  
212

**Figure 2.  $m^6A$  is present in the poly(A) tail of VSG mRNA and other transcripts.**

**a.** Immunoblotting with anti- $m^6A$  antibody. RNA samples (from left to right): total RNA (Total), Poly(A)-enriched (A+) RNA and Poly(A)-depleted (A-) RNA from two life cycle stages (BSF and PCF). The last lane contains total mouse liver RNA (Mouse). 2  $\mu$ g of total RNA, 2  $\mu$ g of poly(A)-depleted RNA and 100 ng of poly(A)-enriched RNA was loaded per lane. rRNA was detected by staining RNA with methylene blue to confirm equal loading between total and poly(A)-depleted fractions. As expected the rRNA are undetectable in the poly(A)-enriched fraction. **b.** Intensity of the  $m^6A$  signal in immunoblot, measured by Image J, in the whole lane containing the poly(A)-enriched RNA of bloodstream forms. The intensity of the ~1.8 kb band was compared with the signal intensity of the entire lane, and averaged from 5 independent samples. **c.** Diagram displaying the location of the oligonucleotides used in RNase H digestion of VSG mRNA. The digestion products detected in the immunoblot (panel D) after incubation with each oligonucleotide (SL, A, B, C, dT) are also indicated. **d.** Immunoblotting with anti- $m^6A$  antibody of mammalian bloodstream forms total RNA pre-incubated with indicated oligonucleotides and digested with RNase H. 2  $\mu$ g of total RNA were loaded per lane. Staining of rRNA with Methylene Blue confirmed equal loading. SL: spliced leader, dT: poly deoxy-thymidines. Tub:  $\alpha$ -Tubulin.



213

214

215

216 We first performed RNase H digestion of RNA pre-incubated without any  
217 oligonucleotide or with a control oligonucleotide that annealed with  $\alpha$ -tubulin  
218 (another abundant transcript in *T. brucei*) did not affect the mobility of the m<sup>6</sup>A  
219 band (Fig. 2D). Next, we used an oligonucleotide that hybridized to the spliced  
220 leader (SL) sequence, a 39nt sequence that contains the mRNA cap and that is  
221 added to every mRNA by a trans-splicing reaction<sup>23</sup>. RNase H digestion of RNA  
222 pre-incubated with the SL oligonucleotide showed no effect on m<sup>6</sup>A  
223 immunoblotting signal (Fig. 2D). This indicates that m<sup>6</sup>A is neither present in  
224 spliced leader sequence, nor in the mRNA cap structure. In contrast, when we  
225 used oligonucleotides VSG-A, VSG-B and VSG-C, which hybridized to three  
226 different unique sites in the VSG sequence (Fig. 2C), we observed that the major  
227 m<sup>6</sup>A band shifted, and in all three conditions, the 3' end fragment contained the  
228 entire m<sup>6</sup>A signal. Importantly, VSG-C oligonucleotide is adjacent the beginning  
229 of the poly(A) tail. Thus, the 3' fragment released upon RNase H digestion with  
230 VSG-C corresponds to the poly(A) tail of VSG mRNA. This fragment, which  
231 contains the entire m<sup>6</sup>A signal from the VSG transcript, is heterogeneous in length  
232 and shorter than 200 nt (Fig. 2D).

232

233 To further confirm that the 3' fragment released after incubation with VSG-  
234 C and RNase H corresponds to the VSG poly(A) tail, we performed RNase H  
235 digestion in RNA pre-incubated with a poly(T) oligonucleotide. Consistent with  
236 the results using VSG-C, the major band detected by m<sup>6</sup>A-antibody completely  
237 disappears, further supporting the idea that in bloodstream forms most m<sup>6</sup>A is  
238 present in the poly(A) tail of VSG mRNA. Interestingly, digestion of RNA  
239 hybridized with poly(T), also abolished the smear detected by m<sup>6</sup>A-antibody,  
240 indicating that m<sup>6</sup>A present in non-VSG transcripts is also most likely located in  
241 their poly(A) tails. Notably, a similar approach to digest poly(A) tails does not  
242 affect m<sup>6</sup>A levels in mammalian mRNA of HeLa cells<sup>13</sup>. Thus, this is the first  
243 demonstration that a poly(A) tail can harbour a modified nucleotide.

243

244 Our results show that although VSG mRNA is only 4-11% of total mRNA,  
245 it accounts for ~50% of cellular m<sup>6</sup>A, suggesting that VSG mRNA is preferentially  
246 enriched in m<sup>6</sup>A compared to other mRNAs. Based on the m<sup>6</sup>A frequency in the  
247 transcriptome and the enrichment in VSG, we estimate that there are nearly four  
248 m<sup>6</sup>A molecules per VSG mRNA. In contrast, among the non-VSG mRNAs, only  
249 one in five mRNAs are predicted to contain m<sup>6</sup>A.

249

## 250 **Removing m<sup>6</sup>A precedes deadenylation and degradation of VSG transcript**

251

252 The half-life of VSG transcript is 90-270 min, while the median mRNA half-  
253 life in trypanosomes is 13 min<sup>6</sup>. Given that removal of the poly(A) tail often  
254 precedes RNA degradation, we hypothesized that the presence of m<sup>6</sup>A in the  
255 poly(A) tail could account for this exceptional VSG mRNA stability.

256 We tracked m<sup>6</sup>A levels in VSG mRNA as it undergoes degradation in three  
257 independent conditions. We first inhibited transcription in bloodstream form  
258 parasites with actinomycin D (ActD) and, for the next 6 hours, we quantified the  
259 amount of VSG mRNA that remains (by qRT-PCR). We also measured the levels  
260 of m<sup>6</sup>A in VSG (by immunoblotting) and the length of the VSG poly(A) tail using

261 the Poly(A) Tail-Length Assay (PAT), which involves ligation of adaptors to the 3'  
262 end of poly(A) tails and two consecutive PCRs using *VSG*-specific forward  
263 primers (Fig. 3A). The amplified fragments contain part of the ORF, the 3'UTR of  
264 *VSG* transcript and the downstream poly(A) tail, whose size is variable between  
265 different transcript molecules.

266 *VSG* mRNA has previously been shown to exhibit biphasic decay: in the  
267 first hour after transcription blocking *VSG* mRNA levels remain high and, only in  
268 a second phase, do *VSG* mRNA levels decay exponentially<sup>9,24</sup>. Consistent with  
269 these earlier findings, we detected no major changes in mRNA abundance during  
270 the first hour after actinomycin D treatment (lag phase, or first phase); however,  
271 afterwards *VSG* exhibited exponential decay (second phase) (Fig. 3B). During  
272 the one hour lag phase, the length of the *VSG* poly(A) tail was unchanged, but  
273 then it rapidly shortened during the second phase. This indicates that there is a  
274 specific time-dependent step that triggers the rapid shortening of the *VSG* poly(A)  
275 tail and the subsequent degradation of the *VSG* transcript. Immunoblotting  
276 revealed that the m<sup>6</sup>A levels also decreased, but strikingly the loss of m<sup>6</sup>A  
277 preceded the shortening of the poly(A) tail and subsequent mRNA decay (Fig.  
278 3C). In fact, m<sup>6</sup>A levels decrease exponentially during the first hour after  
279 actinomycin D, taking around 35 min for total mRNA m<sup>6</sup>A levels to drop 50%,  
280 while *VSG* mRNA only reached half of the steady-state levels around 2hr (Fig.  
281 3B). These results indicate that m<sup>6</sup>A is removed from *VSG* mRNA prior to the  
282 deadenylation of the poly(A) tail, which is quickly and immediately followed by  
283 degradation of the transcript.

284 When bloodstream form parasites undergo cellular differentiation to  
285 procyclic forms, *VSG* is downregulated as a consequence of decreased  
286 transcription and decreased mRNA stability<sup>9</sup>. To test whether m<sup>6</sup>A is also rapidly  
287 removed from *VSG* mRNA prior to its developmentally programmed degradation,  
288 we induced differentiation *in vitro* by adding cis-aconitate to the medium and  
289 changing the temperature to 27°C. Parasites were collected and total RNA was  
290 extracted in different time points. Quantitative qRT-PCR showed that the levels  
291 of *VSG* mRNA stayed stable for around one hour, which was followed by an  
292 exponential decay (Fig. 3D). Importantly, immunoblotting analysis showed that  
293 during parasite differentiation, m<sup>6</sup>A intensity in the *VSG* mRNA dropped faster  
294 than the *VSG*-mRNA levels, reaching half of the steady-state levels in 23 min  
295 (Fig. 3D-E). Thus, during parasite differentiation, we observed again that the  
296 removal of m<sup>6</sup>A precedes the loss of *VSG* mRNA levels.

297 In addition to differentiation, another trigger for *VSG* mRNA degradation is  
298 translation inhibition, which can be achieved by treating parasites with drugs such  
299 as puromycin<sup>25</sup>. We treated bloodstream form parasites with puromycin and  
300 collected RNA samples for 4 hours. Consistent with previous studies, qRT-PCR  
301 revealed that *VSG* mRNA is actively degraded and it takes around 39 min to  
302 reach half of steady state levels (Extended Data Fig. S3). Immunoblotting  
303 revealed, once again, that m<sup>6</sup>A is removed earlier from the *VSG* transcript with a  
304 half-life of about 10 min (Extended Data Fig. S3).

305 Overall, these results show that in three independent conditions, m<sup>6</sup>A is  
306 removed from the *VSG* transcript earlier than the *VSG* transcript is deadenylated  
307 and degraded, suggesting that m<sup>6</sup>A may need to be removed from the *VSG*  
308 transcript before it can be degraded.



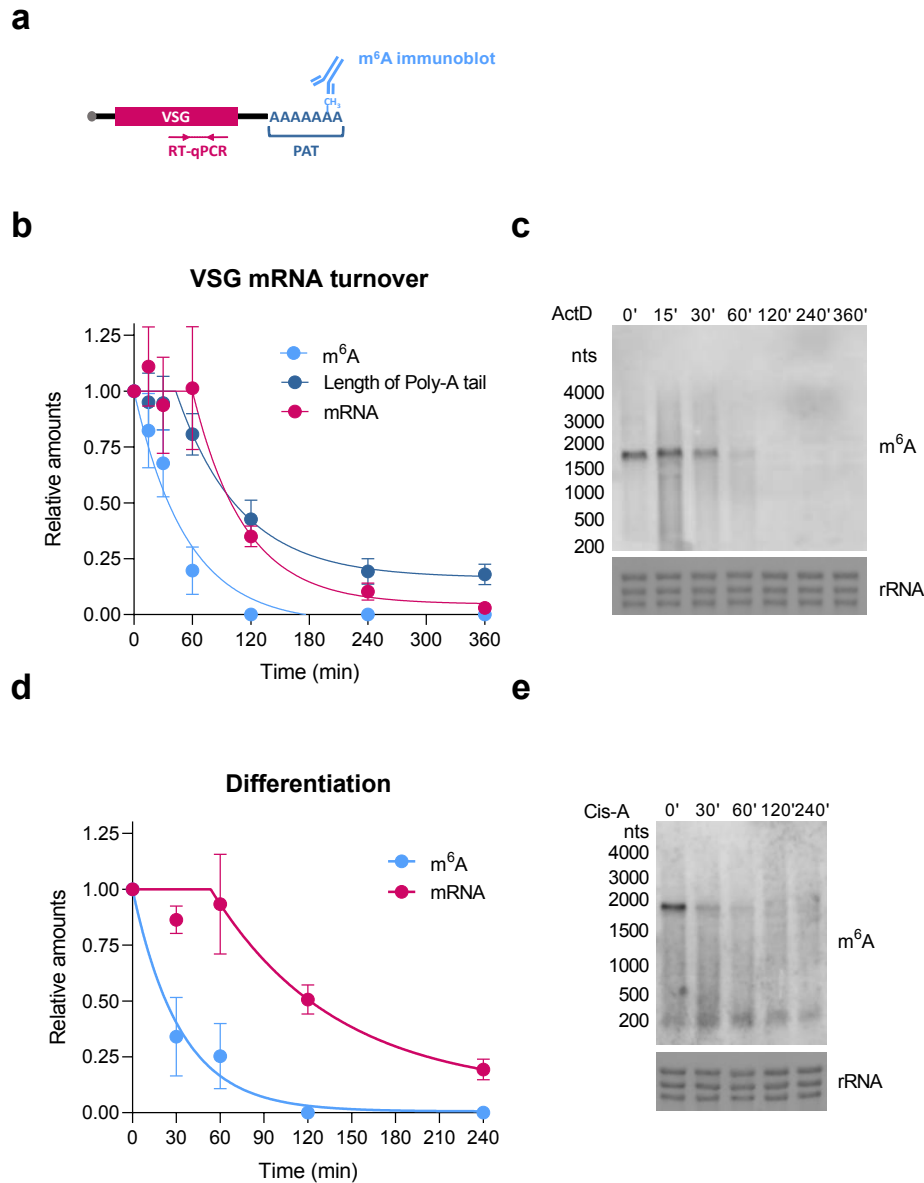

309

310

311 **Figure 3. m<sup>6</sup>A is removed from VSG mRNA prior to its degradation.**

312 **a.** Diagram of VSG2 mRNA transcript. Primers used for qRT-PCR are indicated in pink, primers  
 313 used for PAT assay are indicated in dark blue and methylated adenosines of the poly(A) tail are  
 314 indicated in light blue. **b.** Quantification of VSG2 transcript levels, m<sup>6</sup>A signal and the length of  
 315 poly(A) tail after transcription halt by actinomycinD (ActD). Total RNA of bloodstream parasites  
 316 was extracted after various time-points of ActD treatment. Values were normalized to 0 hr.  
 317 Transcript levels were measured by qRT-PCR (pink), m<sup>6</sup>A levels were measured by  
 318 immunoblotting signal (light blue) and the length of the poly(A) tail was measured by PAT assay  
 319 (dark blue). **c.** Immunoblotting with anti-m<sup>6</sup>A antibody of bloodstream form total RNA extracted  
 320 from parasites treated with actinomycin D for increasing times. 2 μg of total RNA were loaded per  
 321 lane. Staining of rRNA with Methylene Blue confirmed equal loading. **d.** Quantification of VSG2  
 322 transcript levels, m<sup>6</sup>A signal and the length of poly(A) tail during parasite differentiation from  
 323 bloodstream to procyclic forms. Total RNA was extracted at different time-points after inducing  
 324 differentiation with cis-aconitate. Values were normalized to 0 hr. Same color code as in Panel B.  
 325 **e.** Immunoblotting with anti-m<sup>6</sup>A antibody of parasites differentiating to procyclic forms. 2 μg of  
 326 total RNA were loaded per lane. Staining of rRNA with methylene blue confirmed equal loading.  
 327 (see also Extended Data Fig. S3)  
 328

329

330 **Inclusion of m<sup>6</sup>A in VSG mRNA is dependent on *de novo* transcription**

331 In most organisms, m<sup>6</sup>A is generated by methylation of adenosine  
332 residues within a specific consensus sequence by the METTL3  
333 methyltransferase or its orthologs<sup>15</sup>. Given that in *T. brucei*, m<sup>6</sup>A is present in the  
334 poly(A) tail, a different mechanism is likely used. Indeed, trypanosomes lack a  
335 METTL3 ortholog<sup>26</sup>, indicating that a different pathway would be required to  
336 acquire m<sup>6</sup>A in the poly(A) tail. To understand how m<sup>6</sup>A accumulates in the VSG  
337 mRNA, we used parasite differentiation as a natural inducible system of VSG  
338 downregulation. This process is reversible in the first two hours<sup>27</sup>. Parasite  
339 differentiation was induced by adding cis-aconitate for 30 min (as described  
340 above, Fig. 3D), and then was washed away. As shown above, immunoblotting  
341 revealed that m<sup>6</sup>A was reduced after 30 min of cis-aconitate treatment (Fig. 4A-  
342 B, Fig. 3E). In contrast, when cells were allowed to recover for 1 hr in the absence  
343 of cis-aconitate or other drugs, we observed that the intensity of the m<sup>6</sup>A signal  
344 returned to normal levels (Fig. 4A-B). These results indicate that, if differentiation  
345 is halted and the levels of VSG mRNA are re-established (Extended Data Fig.  
346 S4), VSG m<sup>6</sup>A is quickly recovered.

347 To test if the recovery of m<sup>6</sup>A levels after cis-aconitate removal was due  
348 to *de novo* transcription, parasites were cultured in the presence of actinomycin  
349 D. We observed that the intensity of m<sup>6</sup>A in the VSG transcript was not recovered.  
350 Instead, the m<sup>6</sup>A levels decreased by ~20% (Fig. 4A-B). Overall, these results  
351 indicate that *de novo* transcription is required to re-establish m<sup>6</sup>A levels in VSG  
352 mRNA.

353 If m<sup>6</sup>A is included in VSG mRNA soon after transcription, and if it remains  
354 in the poly(A) tail until it gets degraded, we should be able to detect m<sup>6</sup>A in the  
355 nucleus and in the cytoplasm of the parasites. Immunofluorescence analysis with  
356 an antibody against m<sup>6</sup>A showed a punctate pattern both in the nucleus (20%)  
357 and cytoplasm (80%) (Fig. 4D-E). To confirm that this m<sup>6</sup>A signal originated from  
358 RNA, we incubated the fixed cells with nuclease P1 prior to the antibody staining,  
359 which specifically cleaves single-stranded RNA without any sequence-specific  
360 requirement. This treatment caused a marked reduction in the intensity of the  
361 m<sup>6</sup>A signal, indicating that the immunoreactivity of the m<sup>6</sup>A antibody derives from  
362 RNA, and not non-specific interactions with cellular proteins (Fig. 4C-D). As an  
363 additional control, we treated with actinomycin D for 2 hr prior to  
364 immunofluorescence analysis. This treatment is expected to result in reduced  
365 cellular mRNA levels. Immunostaining with the m<sup>6</sup>A antibody showed a drop in  
366 the intensity of the m<sup>6</sup>A signal by around 40% (Fig. 4D-E), which is similar to the  
367 reduction observed by immunoblotting (Fig. 3B-C). Overall, these data support  
368 the idea that the m<sup>6</sup>A immunostaining results likely reflect m<sup>6</sup>A in mRNA and not  
369 a non-specific binding of the antibody to the cells.

370

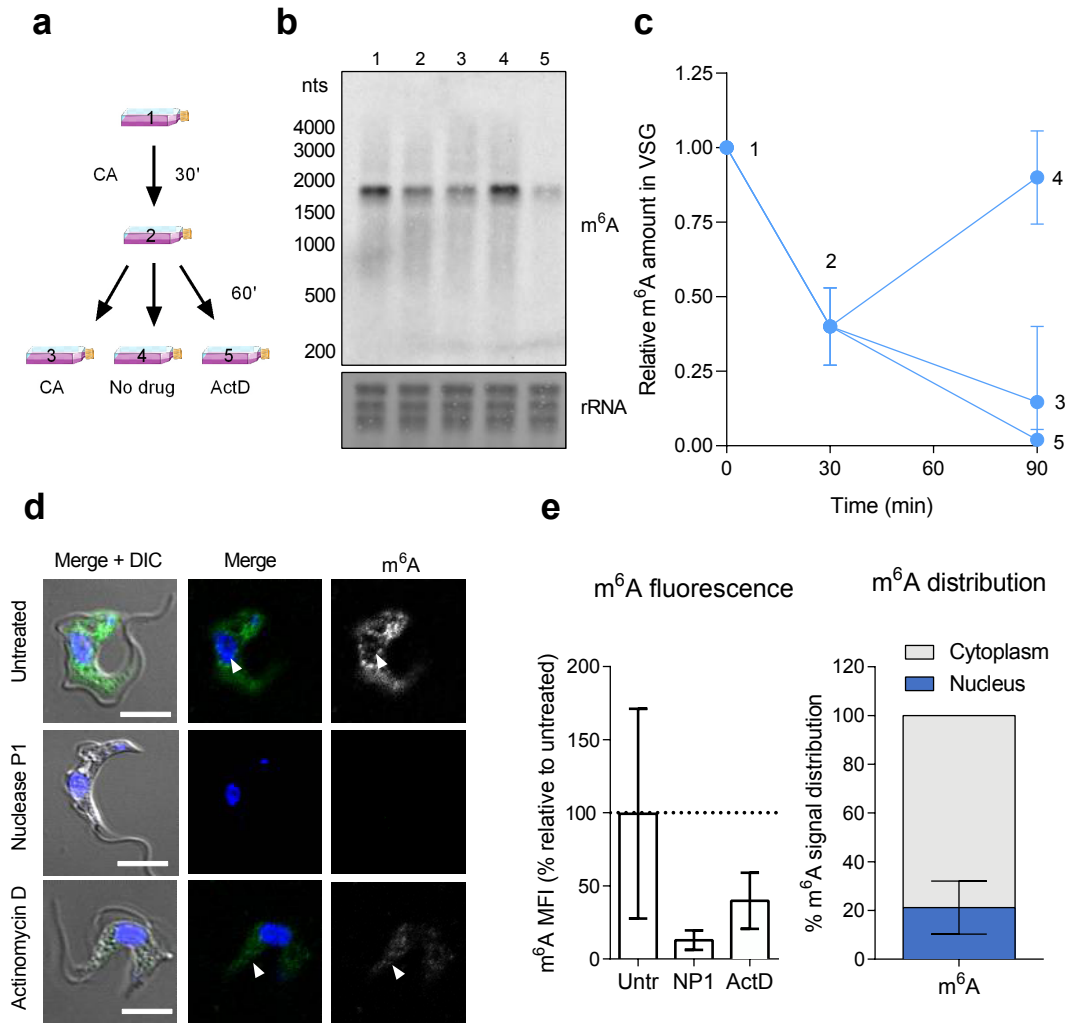

371

372

**Figure 4. Inclusion of m<sup>6</sup>A in the VSG poly(A) tail depends of *de novo* transcription.**

373

**a.** Experimental setup. Parasites were treated with cis-aconitate (CA) for 30 min, time at which

374

the compound was washed away. Parasites were placed back in culture in 3 different conditions

375

for an extra hour: in the presence of cis-aconitate, without cis-aconitate, without cis-aconitate but

376

with transcription inhibitor actinomycin D (ActD). Labels 1-5 indicate the conditions at which

377

parasites were collected for Immunoblotting analysis (panel B). **b.** Immunoblot with anti-m<sup>6</sup>A

378

antibody of total RNA from bloodstream parasites collected at each of the 5 labelled conditions

379

(panel A). **c.** Quantification of Immunoblotting in panel A. All levels were normalized to time point

380

0 hr. **d.** Immunofluorescence analysis showing m<sup>6</sup>A localization in mammalian BSF. Parasites

381

were treated with Nuclease P1 (NP1) or actinomycin D (ActD) to confirm signal-specificity. Nuclei

382

were stained with Hoechst. Arrow in top row points to m<sup>6</sup>A signal in the nucleus. Arrow in bottom

383

panel points to weak m<sup>6</sup>A signal; scale bars, 4 μm. **e.** Quantification of mean fluorescence intensity

384

(MFI) levels of m<sup>6</sup>A in untreated BSF, nuclease P1 (NP1)-treated BSF, and actinomycin D (ActD)-

385

treated BSF. Raw MFIs were obtained, the average of the untreated BSF equalled to 100%, and

386

all other values normalized to 100%. Error bars indicate SEM. Results shown are the mean of *n*

387

= 2 independent experiments, and *n* = 500 parasites per condition. **f.** Quantification of the

388

proportion of m<sup>6</sup>A signal in nucleus and cytoplasm across 500 parasites (untreated BSF). The

389

proportion was calculated by segmentation dividing the parasite body and nucleus, and

390

quantifying fluorescence intensity in each segment. Error bars indicate SEM. DIC, differential

391

interference contrast.

392

(see also Extended Data Fig. S4)

393

394 **Inclusion of m<sup>6</sup>A in VSG poly(A) tail is dependent on neighboring cis-acting**  
395 **motif**

396

397 m<sup>6</sup>A is added to the VSG mRNA poly(A) tail soon after transcription,  
398 probably still in the nucleus. m<sup>6</sup>A is not simply targeted to all poly(A) tails in the  
399 cell since, if this were the case, all mRNAs would be methylated and VSG  
400 methylation would only account for 4-11% of total cellular m<sup>6</sup>A. We therefore  
401 asked how the VSG poly(A) tail is selected for preferential enrichment of m<sup>6</sup>A. It  
402 has been previously shown that each VSG gene contains a conserved 16-mer  
403 motif (5'-TGATATATTTAACAC-3') in the 3'UTR adjacent to the poly(A) tail that  
404 is necessary for VSG mRNA stability<sup>7</sup>. It has been proposed that a currently  
405 unknown RNA-binding protein may bind this motif and stabilize the transcript by  
406 an unknown mechanism<sup>7</sup>. Here, we hypothesized that this 16-mer motif may act  
407 *in cis* to promote inclusion of m<sup>6</sup>A of the adjacent poly(A) tail.

408 To test the function of the 16-mer motif, we could not simply mutagenize  
409 it because this would lead to an irreversible loss of VSG protein, which is lethal  
410 for the parasites<sup>7</sup>. Therefore, we created two reporter cell-lines, in which a second  
411 VSG gene (*VSG117*) was introduced in the active BES, from where *VSG2* is  
412 normally transcribed (Fig. 5A). As a result, these reporter cell-lines are VSG  
413 double-expressors, i.e. they simultaneously express *VSG2* and *VSG117* at the  
414 cell surface. In the cell line designated "VSG double expressor 1", or "DE1", the  
415 *VSG117* gene contains the endogenous *VSG2* 3'UTR which harbors the 16-mer  
416 motif. In the second cell-line, "VSG double expressor 2", or "DE2", *VSG117*  
417 contains the same 3'UTR, except that the sequence of the 16-mer motif was  
418 scrambled (5'-GTTATACAAAACCTTTT-3') (Fig. 5A). As has been previously  
419 reported, the transcript levels of *VSG2* and *VSG117* are dependent on each other  
420 and are dependent on the presence of the 16-mer motif<sup>7</sup>. Quantitative RT-PCR  
421 analysis showed that the two VSGs have roughly the same levels in DE1 cell-  
422 line. However, in DE2, *VSG117* transcript is about 7-fold less abundant than  
423 *VSG2*. (Fig. 5B, 5D).

424 To test whether the 16-mer motif is required for inclusion of m<sup>6</sup>A in VSG  
425 poly(A) tails, we performed m<sup>6</sup>A immunoblotting of cellular RNA obtained from  
426 the two double-expressor cell lines. Given that *VSG2* and *VSG117* transcripts  
427 have similar sizes (~1.8 kb), we used RNase H to selectively cleave *VSG2* before  
428 resolving the RNA on gel. *VSG2* cleavage was performed by incubating the total  
429 RNA sample with an oligonucleotide that hybridizes to the *VSG2* open reading  
430 frame, followed by incubation with RNase H (as described in Fig. 2). As expected,  
431 the *VSG2*-m<sup>6</sup>A-containing fragment is smaller and runs faster on gel (Fig. 5C).  
432 An "m<sup>6</sup>A index" was calculated by dividing the relative intensity of m<sup>6</sup>A in each  
433 VSG band (Fig. 5C) by the corresponding relative transcript levels measured by  
434 qRT-PCR (Fig. 5B). A low m<sup>6</sup>A index indicates a given transcript has fewer  
435 modified nucleotides (Fig. 5D).

436

437

438

439 **Figure 5. Conserved VSG 16-mer**  
 440 **motif is required for inclusion of m<sup>6</sup>A**  
 441 **in adjacent poly(A) tail.**

442 **a.** Diagram of 16-mer motif VSG double-  
 443 expressor (DE) cell-lines. *VSG117* was  
 444 inserted immediately downstream of the  
 445 promoter of the active bloodstream  
 446 expression site, which naturally contains  
 447 *VSG2* at the telomeric end. In VSG double  
 448 expressor 16-mer<sup>WT</sup> cell-line, *VSG117*  
 449 contains its endogenous 3'UTR with the  
 450 conserved 16-mer motif (sequence shown in  
 451 blue). In VSG double expressor 16-mer<sup>MUT</sup>  
 452 cell-line, the 16-mer motif was scrambled  
 453 (sequence shown in orange). **b.** Transcript  
 454 levels of *VSG117* and *VSG2* transcripts  
 455 measured by qRT-PCR in both reporter cell-  
 456 lines. Levels were normalized to transcript  
 457 levels in cell-lines expressing only *VSG2* or  
 458 only *VSG117*. **c.** Immunoblot with anti-m<sup>6</sup>A  
 459 antibody of mRNA from VSG double-  
 460 expressor cell-lines. RNase H digestion of  
 461 *VSG2* mRNA was used to resolve *VSG2*  
 462 and *VSG117* transcripts. Different quantities  
 463 of the same VSG double expressor 16-mer<sup>WT</sup>  
 464 cell-line was loaded in two separate lanes  
 465 (50ng and 12.5ng) to show that the *VSG117*  
 466 band is detectable in both conditions. **d.** m<sup>6</sup>A  
 467 index calculated as the ratio of m<sup>6</sup>A intensity  
 468 and mRNA levels, measured in panels c.  
 469 and b., respectively. und., undetectable. #  
 470 intensities measured in lane 3 of Figure 5C  
 471 (see also Extended Data Fig. S5)

472  
 473  
 474  
 475

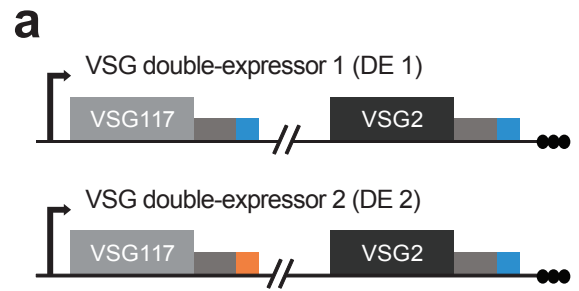

16-mer<sup>WT</sup> T G A T A T A T T T T A A C A C

16-mer<sup>MUT</sup> G T T A T A C A A A A C T T T T

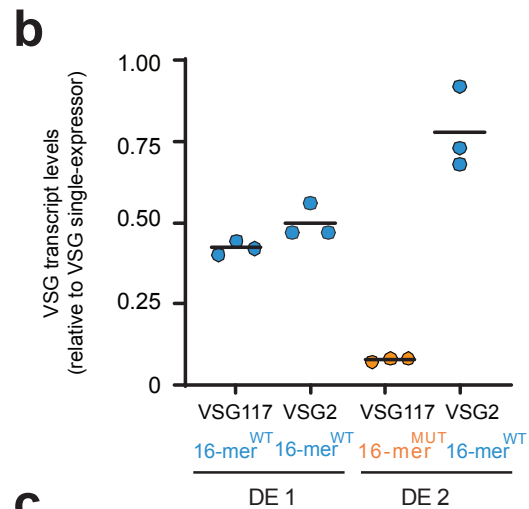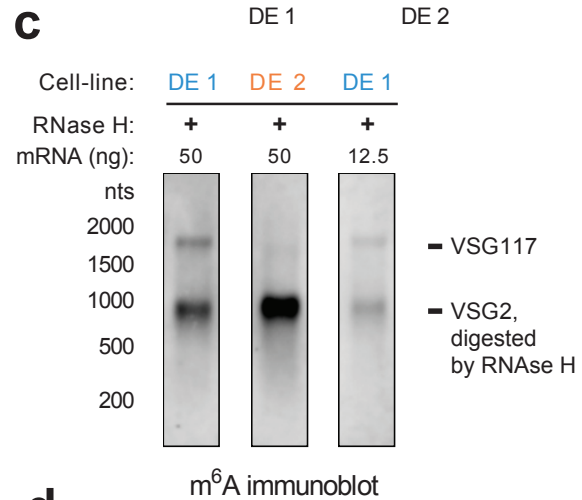

**d**

| Cell-line | VSG/<br>3' UTR                  | m <sup>6</sup> A intensity<br>(immunoblot) | mRNA<br>(qPCR) | m <sup>6</sup> A index<br>(AU) |
|-----------|---------------------------------|--------------------------------------------|----------------|--------------------------------|
| DE 1      | VSG117<br>16-mer <sup>WT</sup>  | 8.2 (2.1) #                                | 0.42           | 19.6                           |
|           | VSG2<br>16-mer <sup>WT</sup>    | 35.2 (8.5) #                               | 0.50           | 70.3                           |
| DE 2      | VSG117<br>16-mer <sup>MUT</sup> | und.                                       | 0.08           | und.                           |
|           | VSG2<br>16-mer <sup>WT</sup>    | 110.7                                      | 0.78           | 141.9                          |



476 Whenever the 3'UTR of *VSG* transcripts contain a 16-mer<sup>WT</sup> (*VSGs* with a  
477 blue box in Fig. 5A), *VSG* m<sup>6</sup>A bands are detectable by immunoblot and the m<sup>6</sup>A  
478 index varies between 20-140 arbitrary units. In contrast, when the 16-mer motif  
479 is mutagenized (*VSG117* with orange box in Fig. 5A), the *VSG* m<sup>6</sup>A is  
480 undetectable (Fig. 5C), and the m<sup>6</sup>A index therefore is too low to calculate. These  
481 results indicate that the motif is required for inclusion of m<sup>6</sup>A in the *VSG* transcript.

482 In contrast, if the 16-mer motif played no role in m<sup>6</sup>A inclusion, the *VSG117*  
483 m<sup>6</sup>A index would be identical in both cell-lines (DE1 and DE2), i.e. around 20.  
484 Given that the qRT-PCR quantifications showed the relative intensity of *VSG117*  
485 16-mer<sup>MUT</sup> is ~0.10 (Fig. 5B), the predicted intensity of the *VSG117* 16-mer<sup>MUT</sup>  
486 m<sup>6</sup>A band would have been 20 x 0.10= 2.0 arbitrary units. To be sure that a band  
487 with this level of m<sup>6</sup>A would be detected on an immunoblot, we ran a more diluted  
488 DE1 RNA sample in lane 3 (Fig. 5C). The intensity of the *VSG117* 16-mer<sup>WT</sup> band  
489 is 2.1 arbitrary units (Fig. 5C and 5D), and it is easily detected in the immunoblot.  
490 Given that we could not detect any band corresponding to a putative methylated  
491 *VSG117* 16-mer<sup>MUT</sup> in DE2 (even after over exposure of the immunoblot,  
492 Extended Data Fig. S5), we conclude that the *VSG* conserved 16-mer motif is  
493 necessary for inclusion of m<sup>6</sup>A in the *VSG* poly(A) tail.

494

#### 495 **m<sup>6</sup>A is required for *VSG* mRNA stability**

496 The unusual localization of m<sup>6</sup>A in the poly(A) tail, and the lack of a  
497 METTL3 ortholog, suggests that the underlying biochemistry of m<sup>6</sup>A formation in  
498 trypanosomes is different from what has been described in other eukaryotes.  
499 Given that, at this stage the mechanism of m<sup>6</sup>A formation in the poly(A) tail is  
500 unknown and therefore cannot be directly blocked, we used the genetic mutants  
501 of the 16-mer conserved motif to enquire about the function of m<sup>6</sup>A in *VSG*  
502 mRNA.

503 To test the role of the 16-mer motif on poly(A) length on mRNA stability,  
504 we measured *VSG* mRNA stability in 16-mer<sup>WT</sup> and 16-mer<sup>MUT</sup> cell-lines. *VSG*  
505 mRNA half-life was measured by blocking transcription for 1 hr with actinomycin  
506 D (the duration of the lag phase during *VSG* mRNA decay) and the levels of *VSG*  
507 mRNA were followed by qRT-PCR. PAT assay clearly shows that, when the  
508 *VSG117* transcript contains the 16-mer motif (16-mer<sup>WT</sup> cell-line), the length of  
509 the *VSG117* poly(A) tail is stable for 1 hr (Fig. 6A-B). In contrast, *VSG117*  
510 transcripts containing a scrambled 16-mer motif exhibited very rapid shortening  
511 of the poly(A) tail. In this case, there was no detectable lag phase—instead, the  
512 length of the poly(A) tail was reduced to 25% of its original length after just 15  
513 min, and was undetectable after 1 hr (Fig. 6A-B). Consistent with the fast kinetics  
514 of poly(A) deadenylation, in the absence of an intact 16-mer motif, *VSG117*  
515 transcript levels decayed very rapidly with a half-life of ~20 min (Fig. 6B).

516 Overall, these experiments show that when the *VSG* conserved 16-mer  
517 motif is mutated and the m<sup>6</sup>A is lost, the *VSG* transcript is no longer stable and  
518 exhibits rapid poly(A) deadenylation and a marked reduction of mRNA stability.

519

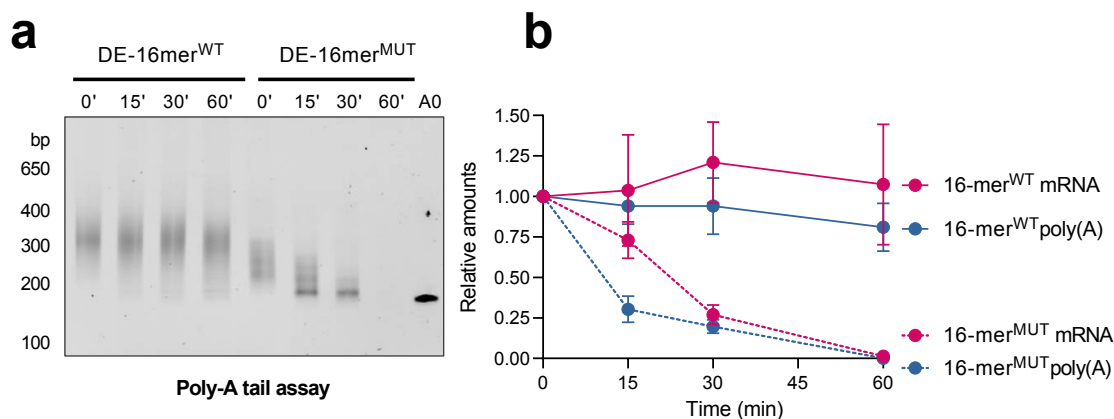

520  
521  
522  
523  
524  
525  
526  
527  
528  
529  
530

### Figure 6. VSG 16-mer motif delays poly(A) tail deadenylation.

**a.** The length of the *VSG* poly(A) tail was measured using Poly(A) tailing (PAT) assay. Specific primers confer specificity to the transcript being analysed. WT and Mut-16-mer cell-lines were compared. A0 corresponds to the minimum length amplified by PAT and it comprises the end of the *VSG* open reading frame and the whole 3'UTR. **b.** Quantification of *VSG117* transcript levels and the length of poly(A) tail after transcription halt by actinomycin D. Total RNA of bloodstream parasites was extracted after the indicate times. Values were normalized to 0 hr. Transcript levels were measured by qRT-PCR (pink) and the length of the poly(A) tail was measured by PAT assay (dark blue).

## 531 Discussion

532  
533  
534  
535  
536  
537  
538  
539

In this work we report the identification and the function of the first RNA epitranscriptomic modification in the poly(A) tail of mRNA. We show that the stability and abundance of *VSG* transcripts stem from a novel mechanism in which the presence of m<sup>6</sup>A in the poly(A) tail inhibits RNA degradation, probably by blocking deadenylation. We also show that m<sup>6</sup>A is regulated by processes that induce destabilization and degradation of *VSG* mRNA such as cellular differentiation.

540  
541  
542  
543  
544  
545  
546  
547  
548  
549  
550  
551  
552  
553  
554  
555  
556

The classic function of a poly(A) tail is to keep mRNAs from being degraded and to promote translation. Poly(A)-binding proteins (PABPs) bind the poly(A) tail and stimulate mRNA translation by interaction with translation initiation factors<sup>28</sup>. Removal of the poly(A) tail by deadenylase complexes (e.g. Ccr4-Not complex) allow the unprotected mRNAs to enter in the 5'→3' or 3'→5' degradation pathways<sup>29,30</sup>. In this report, we identified a novel mechanism by which a poly(A) tail contributes to mRNA stability. We found that the poly(A) tail of *VSG*, a transcript that represents 4-11% of mRNAs from *T. brucei* bloodstream forms, contains half of the m<sup>6</sup>A present in the cell. Our estimates suggest that each *VSG* poly(A) tail has around 4 modified adenosines. When we measured *VSG* mRNA decay rates by treating with transcription-blocking drugs, we found that m<sup>6</sup>A is removed from the *VSG* poly(A) tail before the tail is deadenylated and mRNA is degraded, raising the possibility that m<sup>6</sup>A normally prevents these processes. A similar observation was made during parasite differentiation. The removal of m<sup>6</sup>A may therefore be the step that initiates deadenylation and mRNA decay. To test this idea, we removed a 16-mer motif in the 3'UTR, which we find is necessary for the inclusion of m<sup>6</sup>A in the *VSG* poly(A)

557 tail. When m<sup>6</sup>A levels in VSG mRNA become undetectable, by mutating this  
558 sequence element, the VSG mRNA exhibits rapid deadenylation and mRNA  
559 decay. Overall these data support the idea that m<sup>6</sup>A acts as a stabilizer of the  
560 VSG mRNA.

561 The presence of m<sup>6</sup>A in the poly(A) tail is so far unique to trypanosomes.  
562 In other eukaryotes, m<sup>6</sup>A has been mainly detected by m<sup>6</sup>A mapping approaches  
563 around the stop codon and 3' UTR, where it plays a role in mRNA stability and  
564 translation<sup>15</sup>. A mapping study was recently published in *T. brucei* in which the  
565 authors conclude that m<sup>6</sup>A localizes in internal regions of transcripts<sup>31</sup>. m<sup>6</sup>A was  
566 not reported to be in the poly(A) tail in this previous study. However, m<sup>6</sup>A mapping  
567 relies on aligning m<sup>6</sup>A-containing RNA fragments to genomic sequence. Since  
568 the poly(A) sequence is not encoded in the genome, and m<sup>6</sup>A-containing  
569 fragment from the poly(A) tail would not be mappable and therefore not detected  
570 in this or any other previous m<sup>6</sup>A mapping study.

571 It remains unclear how m<sup>6</sup>A gets into the poly(A) tail. The presence of m<sup>6</sup>A  
572 in the poly(A) tail suggests that an unusual RNA-methyltransferase will directly or  
573 indirectly bind to the 16-mer motif and methylate adenosines that are either  
574 adjacent to the 16-mer motif or become more proximal via a loop-like  
575 conformation of the poly(A) tail. This would explain why orthologs of the canonical  
576 METTL3 enzyme does not exist in the trypanosome genome<sup>26</sup>. Unfortunately,  
577 previous efforts from other labs have been unsuccessful at identifying proteins  
578 that specifically bind to the 16-mer motif<sup>7,32</sup>. An alternative mechanism would be  
579 if m<sup>6</sup>A is incorporated into the poly(A) tail while polymerisation takes place. If this  
580 was true, there should be m<sup>6</sup>ATP inside the cell. Unbiased metabolomics<sup>33</sup> did  
581 not support the existence of m<sup>6</sup>ATP, although studies specifically focused on  
582 detecting this nucleotide would be required to completely disprove this model.

583 Deadenylation is the first step in the main mRNA decay pathway in  
584 eukaryotes<sup>34</sup>. *T. brucei* is not an exception<sup>23</sup>. In this study we showed that m<sup>6</sup>A  
585 seems to protect the poly(A) tail from deadenylation. The molecular mechanism  
586 behind this stabilizing effect is unknown. It is possible that the deadenylases are  
587 inefficient on a methylated poly(A) tail. There is structural and biochemical  
588 evidence that poly(A) tails adopt a tertiary structure that facilitates the recognition  
589 by some deadenylases (CAF1 and Pan2)<sup>35</sup>. When a poly(A) tail contains m<sup>6</sup>A,  
590 just like when it contains guanosines, the tertiary structure may be not properly  
591 assembled and deadenylase activity is inhibited. In this model, a putative  
592 demethylase may be required to remove the methyl group and only then poly(A)  
593 tail would be deadenylated. Alternatively, the stabilizing effect of m<sup>6</sup>A could result  
594 from recruitment of a specific RNA-binding protein, that prevents the poly(A) tail  
595 from being deadenylated.

596  
597 *T. brucei* has around 2000 VSG genes, but only one is actively transcribed  
598 at a given time<sup>2</sup>. By a process of antigenic variation, parasites evade the host  
599 immune response by changing an old VSG surface coat to a new VSG coat that  
600 is antigenically distinct. m<sup>6</sup>A may be removed from VSG mRNA, facilitating the  
601 switch from the old VSG mRNA, so that it can be more rapidly replaced by a new  
602 VSG coat protein. Since m<sup>6</sup>A stabilizes the VSG mRNA, it will also be important  
603 to determine whether inability to synthesize m<sup>6</sup>A in poly(A) tails results in more  
604 frequent switching to new VSG coat proteins. The role of m<sup>6</sup>A in differentiation

605 remains to be established but it is possible that a delayed removal of VSG would  
606 interfere with the interaction of the parasite with the midgut wall.

607 The Rudenko lab has proposed that the maximal amount of VSG mRNA  
608 per cell is dependent on a post-transcriptional limiting factor dependent on the  
609 presence of the 16-mer motif <sup>7</sup>. We propose that this limiting factor is the rate of  
610 inclusion of m<sup>6</sup>A in the poly(A) tails. When the 16-mer motif is present in both  
611 VSG genes, both get partially methylated and their abundance is reduced to  
612 about half of a single-VSG expressor; however, when the 16-mer motif is absent  
613 from one of the VSGs, the second VSG is more methylated and the transcripts  
614 become more abundant.

615 As far as we know, our work describes the first RNA modification in poly(A)  
616 tails. We show that m<sup>6</sup>A is present in the poly(A) tail of *T. brucei* mRNAs, it is  
617 enriched in the most abundant transcript (VSG), and that m<sup>6</sup>A acts as a protecting  
618 factor stabilizing VSG transcripts. It will be important for future studies to identify  
619 the enzymes and proteins involved in adding, reading, or removing this RNA  
620 modification. Given the importance of VSG regulation for chronic infection and  
621 parasite transmission, drug targeting such enzymes is expected to result in an  
622 important loss of parasite virulence. Understanding these regulatory  
623 epitranscriptomic processes may open up possibilities for developing therapeutic  
624 strategies to treat sleepiness sickness.

625  
626

## 627 **References**

- 628  
629 1. Franco, J. R., Simarro, P. P., Diarra, A., Ruiz-Postigo, J. A. & Jannin, J. G. The  
630 journey towards elimination of gambiense human African trypanosomiasis: not  
631 far, nor easy. *Parasitology* **141**, 748-760 (2014).
- 632 2. Horn, D. Antigenic variation in African trypanosomes. *Mol Biochem Parasitol* **195**,  
633 123-129 (2014).
- 634 3. Cross, G. A. Identification, purification and properties of clone-specific  
635 glycoprotein antigens constituting the surface coat of *Trypanosoma brucei*.  
636 *Parasitology* **71**, 393-417 (1975).
- 637 4. Nilsson, D. *et al.* Spliced leader trapping reveals widespread alternative splicing  
638 patterns in the highly dynamic transcriptome of *Trypanosoma brucei*. *PLoS*  
639 *Pathog* **6**, (2010).
- 640 5. Kraus, A. J., Brink, B. G. & Siegel, T. N. Efficient and specific oligo-based  
641 depletion of rRNA. *Sci Rep* **9**, 12281 (2019).
- 642 6. Fadda, A. *et al.* Transcriptome-wide analysis of trypanosome mRNA decay  
643 reveals complex degradation kinetics and suggests a role for co-transcriptional  
644 degradation in determining mRNA levels. *Mol Microbiol* **94**, 307-326 (2014).
- 645 7. Ridewood, S. *et al.* The role of genomic location and flanking 3'UTR in the  
646 generation of functional levels of variant surface glycoprotein in *Trypanosoma*  
647 *brucei*. *Mol Microbiol* **106**, 614-634 (2017).
- 648 8. Roditi, I. *et al.* Procyclin gene expression and loss of the variant surface  
649 glycoprotein during differentiation of *Trypanosoma brucei*. *J Cell Biol* **108**, 737-  
650 746 (1989).
- 651 9. Ehlers, B., Czichos, J. & Overath, P. RNA turnover in *Trypanosoma brucei*. *Mol*  
652 *Cell Biol* **7**, 1242-1249 (1987).



- 653 10. Matthews, K. R. The developmental cell biology of *Trypanosoma brucei*. *J Cell*  
654 *Sci* **118**, 283-290 (2005).
- 655 11. Wei, C. M., Gershowitz, A. & Moss, B. Methylated nucleotides block 5' terminus  
656 of HeLa cell messenger RNA. *Cell* **4**, 379-386 (1975).
- 657 12. Perry, R. P., Kelley, D. E., Friderici, K. & Rottman, F. The methylated constituents  
658 of L cell messenger RNA: evidence for an unusual cluster at the 5' terminus. *Cell*  
659 **4**, 387-394 (1975).
- 660 13. Meyer, K. D. *et al.* Comprehensive analysis of mRNA methylation reveals  
661 enrichment in 3' UTRs and near stop codons. *Cell* **149**, 1635-1646 (2012).
- 662 14. Dominissini, D. *et al.* Topology of the human and mouse m6A RNA methylomes  
663 revealed by m6A-seq. *Nature* **485**, 201-206 (2012).
- 664 15. Zaccara, S., Ries, R. J. & Jaffrey, S. R. Reading, writing and erasing mRNA  
665 methylation. *Nat Rev Mol Cell Biol* **20**, 608-624 (2019).
- 666 16. Freistadt, M. S., Cross, G. A. & Robertson, H. D. Discontinuously synthesized  
667 mRNA from *Trypanosoma brucei* contains the highly methylated 5' cap structure,  
668 m7GpppA\*A\*C(2'-O)mU\*A. *J Biol Chem* **263**, 15071-15075 (1988).
- 669 17. Bangs, J. D., Crain, P. F., Hashizume, T., McCloskey, J. A. & Boothroyd, J. C.  
670 Mass spectrometry of mRNA cap 4 from trypanosomatids reveals two novel  
671 nucleosides. *J Biol Chem* **267**, 9805-9815 (1992).
- 672 18. Perry, K. L., Watkins, K. P. & Agabian, N. Trypanosome mRNAs have unusual  
673 "cap 4" structures acquired by addition of a spliced leader. *Proc Natl Acad Sci U*  
674 *S A* **84**, 8190-8194 (1987).
- 675 19. Hauenschild, R. *et al.* The reverse transcription signature of N-1-methyladenosine  
676 in RNA-Seq is sequence dependent. *Nucleic Acids Res* **43**, 9950-9964 (2015).
- 677 20. Boccaletto, P. *et al.* MODOMICS: a database of RNA modification pathways.  
678 2017 update. *Nucleic Acids Res* **46**, D303-D307 (2018).
- 679 21. Siegel, T. N., Gunasekera, K., Cross, G. A. & Ochsenreiter, T. Gene expression  
680 in *Trypanosoma brucei*: lessons from high-throughput RNA sequencing. *Trends*  
681 *Parasitol* **27**, 434-441 (2011).
- 682 22. Butter, F. *et al.* Comparative proteomics of two life cycle stages of stable isotope-  
683 labeled *Trypanosoma brucei* reveals novel components of the parasite's host  
684 adaptation machinery. *Mol Cell Proteomics* **12**, 172-179 (2013).
- 685 23. Clayton, C. E. Regulation of gene expression in trypanosomatids: living with  
686 polycistronic transcription. *Open Biology* **9**, 190072 (2019).
- 687 24. Hoek, M., Zanders, T. & Cross, G. A. M. *Trypanosoma brucei* expression-site-  
688 associated-gene 8 protein interacts with a *Pumilio* family protein. *Mol. Biochem.*  
689 *Parasitol.* **120**, 269-283 (2002).
- 690 25. Ehlers, B., Czichos, J. & Overath, P. Repression and reactivation of the variant  
691 surface glycoprotein gene in *Trypanosoma brucei*. *FEBS Lett* **225**, 53-58 (1987).
- 692 26. Iyer, L. M., Zhang, D. & Aravind, L. Adenine methylation in eukaryotes:  
693 Apprehending the complex evolutionary history and functional potential of an  
694 epigenetic modification. *Bioessays* **38**, 27-40 (2016).
- 695 27. Domingo-Sananes, M. R., Szoor, B., Ferguson, M. A., Urbaniak, M. D. &  
696 Matthews, K. R. Molecular control of irreversible bistability during trypanosome  
697 developmental commitment. *J Cell Biol* **211**, 455-468 (2015).
- 698 28. Gallie, D. R. The role of the poly(A) binding protein in the assembly of the Cap-  
699 binding complex during translation initiation in plants. *Translation (Austin)* **2**,  
700 e959378 (2014).
- 701 29. Garneau, N. L., Wilusz, J. & Wilusz, C. J. The highways and byways of mRNA  
702 decay. *Nat Rev Mol Cell Biol* **8**, 113-126 (2007).
- 703 30. Chen, C. Y. & Shyu, A. B. Mechanisms of deadenylation-dependent decay. *Wiley*  
704 *Interdiscip Rev RNA* **2**, 167-183 (2011).



- 705 31. Liu, L. *et al.* Differential m6A methylomes between two major life stages allows  
706 potential regulations in *Trypanosoma brucei*. *Biochem Biophys Res Commun*  
707 **508**, 1286-1290 (2019).
- 708 32. Klein, C., Terrao, M., Inchaustegui Gil, D. & Clayton, C. Polysomes of  
709 *Trypanosoma brucei*: Association with Initiation Factors and RNA-Binding  
710 Proteins. *PLoS One* **10**, e0135973 (2015).
- 711 33. Creek, D. J. *et al.* Probing the metabolic network in bloodstream-form  
712 *Trypanosoma brucei* using untargeted metabolomics with stable isotope labelled  
713 glucose. *PLoS Pathog* **11**, e1004689 (2015).
- 714 34. Decker, C. J. & Parker, R. A turnover pathway for both stable and unstable  
715 mRNAs in yeast: evidence for a requirement for deadenylation. *Genes Dev* **7**,  
716 1632-1643 (1993).
- 717 35. Tang, T. T. L., Stowell, J. A. W., Hill, C. H. & Passmore, L. A. The intrinsic  
718 structure of poly(A) RNA determines the specificity of Pan2 and Caf1  
719 deadenylases. *Nat Struct Mol Biol* **26**, 433-442 (2019).
- 720 36. Wirtz, E., Leal, S., Ochatt, C. & Cross, G. A. M. A tightly regulated inducible  
721 expression system for dominant negative approaches in *Trypanosoma brucei*.  
722 *Molecular & Biochemical Parasitology* **99**, 89-101 (1999).
- 723 37. Hirumi, H. & Hirumi, K. Continuous cultivation of *Trypanosoma brucei* blood  
724 stream forms in a medium containing a low concentration of serum protein  
725 without feeder cell layers. *J Parasitol* **75**, 985-989 (1989).
- 726 38. Vassella, E. & Boshart, M. High molecular mass agarose matrix supports growth  
727 of bloodstream forms of pleomorphic *Trypanosoma brucei* strains in axenic  
728 culture. *Mol Biochem Parasitol* **82**, 91-105 (1996).
- 729 39. Czichos, J., Nonnengaesser, C. & Overath, P. *Trypanosoma brucei*: cis-aconitate  
730 and temperature reduction as triggers of synchronous transformation of  
731 bloodstream to procyclic trypomastigotes in vitro. *Exp Parasitol* **62**, 283-291  
732 (1986).
- 733 40. Pfaffl, M. W. A new mathematical model for relative quantification in real-time RT-  
734 PCR. *Nucleic Acids Res* **29**, e45 (2001).
- 735 41. Haanstra, J. R. *et al.* Control and regulation of gene expression: quantitative  
736 analysis of the expression of phosphoglycerate kinase in bloodstream form  
737 *Trypanosoma brucei*. *J Biol Chem* **283**, 2495-2507 (2008).
- 738 42. Berriman, M. *et al.* The genome of the African trypanosome *Trypanosoma brucei*.  
739 *Science* **309**, 416-422 (2005).
- 740 43. Koch, H., Raabe, M., Urlaub, H., Bindereif, A. & Preußner, C. The polyadenylation  
741 complex of *Trypanosoma brucei*: Characterization of the functional poly(A)  
742 polymerase. *RNA Biology* **13**, 221-231 (2016).
- 743  
744  
745

## 746 **Supplementary information**

747

748 Figures S1 to S5

749 Tables S1 to S3

750

## 751 **Acknowledgments**

752

753 The authors thank support from Howard Hughes Medical Institute  
754 International Early Career Scientist Program [55007419] and European  
755 Molecular Biology Organization Installation grant [2151]. This work was also  
756 partially supported by ONEIDA project (LISBOA-01-0145-FEDER-016417) co-  
757 funded by FEEI - "Fundos Europeus Estruturais e de Investimento" from  
758 "Programa Operacional Regional Lisboa 2020" and by national funds from FCT -  
759 "Fundação para a Ciência e a Tecnologia". Researchers were funded by  
760 individual fellowships from Fundação para a Ciência e Tecnologia  
761 (PD/BD/105838/2014 to IJV, SFRH/BD/80718/2011 to FAB); a Novartis  
762 Foundation for Biomedical-Biological research to JPM; a Human Frontier Science  
763 Programme long term postdoctoral fellowship to MDN (LT000047/2019); the  
764 GlycoPar Marie Curie Initial Training Network (GA 608295) to JAR. LMF is an  
765 Investigator of the Fundação para a Ciência e Tecnologia. Publication of this work  
766 was also funded LISBOA-01-0145-FEDER-007391, project cofunded by FEDER,  
767 through POR Lisboa 2020 - Programa Operacional Regional de Lisboa,  
768 PORTUGAL 2020, and Fundação para a Ciência e a Tecnologia. We are grateful  
769 to Jane Thomas-Oates and Ed Bergstrom (York University, Centre of Excellence  
770 in Mass Spectrometry, Department of Chemistry) for the Mass-spectrometry  
771 analysis; Antonio Temudo, Ana Nascimento and Aida Lima for bio-imaging  
772 assistance; Ana Pena and members of Figueiredo and Jeffrey labs for helpful  
773 discussions.

774

775

## 776 **Author contributions**

777 I.J.V., J.P.M., M.D.N and J.A.R performed experiments.

778 I.J.V., J.P.M., M.D.N, J.A.R, F.A.B, S.R.J and L.M.F planned experiments &  
779 analyzed data.

780 I.J.V., F.A.B., J.A.R., S.R.J and L.M.F conceived study.

781 I.J.V., S.R.J and L.M.F wrote manuscript, with contributions of all remaining  
782 authors.

783

## 784 **Competing interests**

785 The authors do not have conflicts of interest.

786

787

788

789

790

## 791 **Methods**

792

### 793 **Cell culture and cell-lines**

794 *Trypanosoma brucei* bloodstream form (BSF) parasites (EATRO 1125  
795 AnTat1.1 90:13, and Lister 427 antigenic type MiTat 1.2, clone 221a, Single  
796 Marker (SM) cell line<sup>36</sup> were cultured in HMI11, supplemented with 10% Fetal  
797 Bovine Serum, at 37°C in 5% CO<sub>2</sub><sup>37</sup>. Procyclic forms were cultured in DTM  
798 supplemented with 10% Fetal Bovine Serum at 27°C<sup>38,39</sup>. Parasites were  
799 routinely grown in the presence of the selectable drugs: neomycin 2.5 µg·mL<sup>-1</sup>,  
800 hygromycin 5 µg·mL<sup>-1</sup> for EATRO 1125 AnTat1.1 90:13 and neomycin 2.5 µg·mL<sup>-1</sup>  
801 for SM. Transcription was inhibited by treating parasites with 5 µg·mL<sup>-1</sup> of  
802 actinomycin D (Sigma A4262). Differentiation of slender into stumpy forms was  
803 induced by adding 6 mM cis-aconitate (Sigma A3412) to the culture and dropping  
804 temperature to 27°C. Protein translation was inhibited with 50 µg·mL<sup>-1</sup> of  
805 puromycin (ant-pr-1, Invivogen).

806 Parasite cell lines were generated by transfection of *T. brucei* SM with  
807 plasmid p221- purVSG117UTR (Addgene plasmid 59732) or with p221-  
808 purVSG117UTRmut (Addgene plasmid 59732,<sup>7</sup>). The 16-mer mutagenized motif  
809 was introduced in a primer that was used to PCR amplify p221-purVSG117UTR  
810 plasmid. Amplification was performed with Phusion High-Fidelity DNA  
811 polymerase (ThermoScientific). After elimination of original plasmid template by  
812 digestion with *DpnI* (NEB R0176), amplification products were transformed into  
813 *E. coli* JM109 (Promega L2005). Plasmids were isolated and purified from  
814 bacteria, digested with *NotI*-HF (NEB R3189) and *XhoI* (NEB R0146), ethanol  
815 precipitated and transfected. Transfections were made with the AMAXA  
816 nucleofector II (Lonza Bioscience), program X-001, using transfection buffer (90  
817 mM sodium phosphate, 5 mM potassium chloride, 0.15 mM calcium chloride, 50  
818 mM HEPES, pH 7.3). After overnight growth, transfected clones were selected  
819 by adding 1 µg·mL<sup>-1</sup> puromycin.

820

### 821 **LC-MS/MS**

822 RNA samples were digested with nuclease P1 (sigma N8630, 1 U per 50  
823 ng) for 2h at 37°C in buffer (2.5 mM ZnCl<sub>2</sub>, 40 mM NH<sub>4</sub>Ac, pH 5.3). After  
824 dephosphorylation was done by addition of 10 U of Antarctic phosphatase (NEB  
825 M0289) in the buffer provided for 2h at 37°C. Digested samples were diluted in  
826 milli-Q water (10 ng/µL) and filtered with Microcon – 30kDa. Chromatographic  
827 separation was performed on a liquid chromatography system Ultimate 3000  
828 RSLCnano (Thermo Fisher Scientific). Column – CORTECS® P3 (3 mm x 150  
829 mm, 2.7 µm particle size, Waters Corporation). Mobile phase consisted of water  
830 containing 0.1% formic acid (A) and methanol containing 0.1% formic acid (B).  
831 The used elution gradient (A:B, v/v) was as follows: 100:0 for 2 min; 100:75 at 4  
832 min; 75:30 at 9 min; 30:70 at 12 min; 0:100 at 15 min; 0:100 isocratic elution from  
833 15.5 to 20 min. Samples were separated by liquid chromatography (column  
834 Waters CORTECS T3 2.7µ 3.0 x 150 mm, Gradient with mobile phase A of water  
835 0,1% formic acid and mobile phase B of methanol 0,1% formic acid.) and  
836 analyzed in triple quadrupole Thermo Scientific TSQ Endura mass spectrometer

837 with electrospray ionization in positive mode, and followed by multiple reaction  
838 monitoring. The ion mass transitions for m<sup>6</sup>A was 282,090>[150,059-150,061]  
839 and for adenosine was 268,061>[136,110-136,112]. Calibration curves were  
840 done with chemical standards and area under the curve (peak) integrated. To  
841 calculate m<sup>6</sup>A to adenosine molar ratio, m<sup>6</sup>A and adenosine amounts were  
842 calculated in the same sample injection. The ion mass transition of other modified  
843 nucleosides are shown in Supplementary Table 1.

844

#### 845 **RNA isolation and handling**

846 RNA was extracted from bloodstream and procyclic form parasites with  
847 TRIzol (Invitrogen). 10-100 million parasites were lysed in 1 mL of TRIzol. RNA  
848 was isolated according to the instructions of the manufacturer. RNA was treated  
849 with DNase I (NEB M0303) (1 U per 2.5 µg of RNA) for 20 min. Reaction was  
850 inactivated by adding 5 mM EDTA and heating to 75°C for 10 min. Purification of  
851 mRNA was performed with NEBNext mRNA isolation module (NEB E7490),  
852 following the manufacturer's instructions. The RNA that did not bind to the  
853 poly(T)-beads was ethanol precipitated and saved. This RNA fraction was used  
854 as A- RNA.

855 cDNA was generated using a SuperScript II Reverse Transcriptase  
856 (Invitrogen 18064-014), using random hexamers, according to manufacturer's  
857 protocol. Quantitative PCR (qPCR) was performed using SYBR Green PCR  
858 Master Mix (Applied Biosystems 4368702 Power SYBR). Primer efficiencies  
859 were determined using standard curves. Relative quantification was performed  
860 based on the CT (cycle threshold) value and the method of Pfaffl<sup>40</sup>. Amplifications  
861 were normalized to 18S ribosomal RNA transcript. Primers are indicated in  
862 Supplementary Table 2.

863

#### 864 **m<sup>6</sup>A Immunoblotting**

865 DNase I-treated RNA samples were suspended in formaldehyde loading  
866 buffer (30% formamide, 1,2 M formaldehyde, 1X MOPS buffer), denatured by  
867 heating to 70°C for 5 min and immediately transferred to ice. 2 µg of total RNA or  
868 50 ng of mRNA were typically loaded per lane. Samples were resolved on a  
869 denaturing agarose gel (1.4% agarose, 2,2 M formaldehyde, 1X Mops buffer) for  
870 1 h at 100 V at 4°C. RNA was transferred to a nylon membrane (GE Healthcare  
871 Amersham Hybond-N+) by downward transfer with 10X SSC buffer (1,5 M NaCl  
872 150 mM sodium citrate, pH 7.0) for 4-5 h. RNA was UV-crosslinked to the  
873 membrane with a Stratalinker 2400 crosslinker (120 mJ cm<sup>-2</sup>). Membranes were  
874 stained with 0.02% methylene blue (Sigma M9140, diluted in 0,3 M sodium  
875 acetate pH 5.5) for 5 min and washed in RNase free water. After imaging,  
876 methylene blue was removed by incubation in de-staining solution (0,2X SSC 1%  
877 SDS) and washed 3 times in PBST (1X PBS pH 7.4 with 0,1% tween20). Nylon  
878 membranes were blocked by incubation in 5% skimmed milk in PBST for 1 h and  
879 then incubated overnight with 1µg/mL rabbit anti-m<sup>6</sup>A antibody (Abcam  
880 ab151230, 1:1000 in 2.5% skimmed milk in PBST)at 4°C. Membranes were  
881 washed in PBST three times, 10 min each, and then incubated with HRP-  
882 conjugated donkey anti-rabbit IgG (GE Healthcare, NA934), diluted 1: 2500 in  
883 2,5% skimmed milk in PBST for 1 h at room temperature. Membranes were  
884 washed in PBST, three times, 10 min each and signal developed with Western

885 Lightning Plus-ECL, Enhanced Chemiluminescence Substrate kit (PerkinElmer  
886 ref. NEL103E001EA). The percentage of m<sup>6</sup>A in the main “band” co-migrating  
887 with the 2 kb molecular weight standard was measured by the intensity of the  
888 “band” divided by the signal intensity of the whole lane.

889

### 890 **Estimation of m<sup>6</sup>A per VSG mRNA.**

891 The number of m<sup>6</sup>A per VSG mRNA molecule was estimated based on the  
892 enrichment of m<sup>6</sup>A 1) in the VSG transcript (0,06%), 2) on the fraction of m<sup>6</sup>A  
893 present in VSG mRNA (0,50) and 3) on previously quantified parameters  
894 (detailed below). The number of mRNAs per *T. brucei* bloodstream forms cell is  
895 20 000<sup>41</sup>. The number of VSG mRNAs per cell is 1000<sup>41</sup> (assuming that  
896 correspond to 5% of the mRNA). The average mRNA length is 2000 nt<sup>42</sup>. The  
897 approximate length of the poly(A) tail is 100 nt<sup>43</sup>. The approximate frequency of  
898 adenosine in the transcriptome is 0,25.

899

900 The number of adenosines per mRNA molecule correspond to:

901 Number of adenosines (An) = (length of mRNA X frequency of adenosine) + poly(A) tail

$$902 \quad An = (2000 \times 0,25) + 100 \leftrightarrow An = 600 \text{ As}$$

903

904 The total number of adenosines in a bloodstream forms cell correspond to:

905

906 An in bloodstream forms = mRNAs per cell X An per mRNA

907

$$908 \quad An \text{ in BSF} = 20\,000 \times 600 \leftrightarrow An \text{ in BSF} = 12\,000\,000 \text{ As}$$

909

910 The amount of m<sup>6</sup>A per cell in mRNA is:

911

912 m<sup>6</sup>A in bloodstream forms = (adenosines per cell X Frequency of m<sup>6</sup>A in mRNA (%)) /

913 100

$$914 \quad m6A \text{ in BSF} = (12 \cdot 10^6 \times 0,006) / 100 \leftrightarrow m6A \text{ in BSF} = 7200$$

915

916 The amount of m<sup>6</sup>A in VSG mRNA molecules correspond to:

917

918 m<sup>6</sup>A in VSG mRNA = m<sup>6</sup>A in bloodstream forms X Fraction of m<sup>6</sup>A in VSG mRNA

919

$$920 \quad m6A \text{ in VSG} = 7200 \times 0,5 \leftrightarrow m6A \text{ in VSG} = 3600 \text{ m6As}$$

920

921 The amount of m<sup>6</sup>A per VSG mRNA molecule correspond to:

922

923 m<sup>6</sup>A per VSG = m<sup>6</sup>A in VSG / VSG mRNA copies

924

$$925 \quad m6A \text{ per VSG} = 3600 / 1000 \leftrightarrow m6A \text{ per VSG} = 3,6 \sim 4 \text{ m6A per VSG mRNA}$$

926

927 Therefore, every VSG mRNA molecule harbors around 4 m<sup>6</sup>A per molecule.

928

929 Following the same logic, the amount of m<sup>6</sup>A distributed in the non VSG mRNAs  
930 correspond to:

931

931 m<sup>6</sup>A per non-VSG = m<sup>6</sup>A in non-VSG / non-VSG mRNA copies

932

$$932 \quad m6A \text{ per non VSG} = 3600 / 19\,000 \leftrightarrow m6A \text{ per non VSG} = 0,19 \sim 0,2 \text{ m6A per non VSG mRNA}$$

933

934 Therefore, in the non-VSG transcriptome there are around 1 m<sup>6</sup>A per 5 mRNA molecules.

935

936



### 937 **RNA ligase mediated poly(A) tail assay (PAT assay)**

938 5' phosphorylated DNA oligo adaptor (500 pmol) was linked to the free  
939 hydroxyl group at the 3'-end of transcripts (1  $\mu$ g of total RNA) by T4 RNA ligase  
940 1 (NEB M0204) in the presence of 15% (w/v) PEG 8000 at 25°C for 4 h. Note that  
941 the adaptor oligo has a 3'-end dideoxyadenosine to avoid ligation between the  
942 adaptors. The ligated RNA (250 ng) was used to generate cDNA with the  
943 SuperScript II Reverse Transcriptase (Invitrogen 18064-014) according the  
944 manufacturer's protocol using a primer complementary the adaptor. A VSG  
945 specific forward primer and an adaptor specific reverse primer were used for the  
946 subsequent PCR amplification using Phusion High-Fidelity DNA polymerase  
947 (ThermoScientific) with increased MgCl<sub>2</sub> concentration (3.5 mM) and reduced  
948 extension temperature (60°C). The amplification products were diluted 1:500 and  
949 used as a template in a second amplification (nested PCR) with a second VSG  
950 specific forward primer and a second adaptor specific reverse primer. The A0  
951 amplification product (Fig. 6) corresponds to the amplification product without a  
952 poly(A) tail. It results from a PCR amplification in which the reverse primer  
953 anneals at the end of the 3' UTR immediately upstream of the poly(A) tail.  
954 Amplification products were resolved on a 6% TBE-PAGE (polyacrylamide gel  
955 electrophoresis) for 1 h at room temperature and stained with gel red for  
956 visualization. The length of the poly(A) tail estimated by co-migration of the  
957 amplification products with a DNA ladder minus the length of the A0 amplification  
958 product.

959

### 960 **Statistical analysis of decay curves**

961 Data of the decay of mRNA, length of poly(A) tail and m<sup>6</sup>A signal were  
962 fitted in GraphPad Prism to either "Plateau followed by one phase decay" or "one  
963 phase decay". The first were used when the variable decay started after an initial  
964 constant period. The "one phase decay" method was used when the measured  
965 variable decreased since the beginning of the experiment. The curves were  
966 adjusted to the data by the method of least squares, from which the decay  
967 constant K is estimated. The half-life was calculated by the  $\ln(2)/K$ . This data is  
968 summarized in Supplementary Table 3.

969

970

### 971 **RNase H digestion**

972 2  $\mu$ g of total RNA was mixed with a complementary DNA oligo (0.2 pmol)  
973 in water and incubated 5 min at 70°C, after which temperature was reduced 1°C  
974 per min until 37°C. RNA:DNA hybrids were digested by RNase H (Ambion  
975 AM2293) for 30 minutes. The reaction was stopped by adding formaldehyde  
976 loading buffer and incubating at 70°C for 5 min. For RNase H digestions of VSG2  
977 transcript (Fig. 5), a thermostable RNase H (NEB M0523) was used to reduce  
978 unspecific digestion of the abundant VSG117 transcript. Also mRNA, instead of  
979 total RNA, was used as the substrate to reduce the background and increase the  
980 sensitivity in the detection of VSG117 transcript. The digestion mixture was  
981 prepared on ice with 50 ng of mRNA, (0.2 pmol) complementary DNA oligo, and  
982 Thermostable RNase H. The reaction mixture was transferred to the pre-warmed  
983 thermoblock at 50°C and incubated for 25 minutes.

984

985

## 986 **Immunofluorescence assays**

987 Parasites were pelleted by centrifugation (800 g, 3 min, room  
988 temperature), resuspended in the remaining medium and transferred to an  
989 microcentrifuge tube. Pellet was resuspended in PBS and immediately fixed 4%  
990 v/v formaldehyde with gentle agitation by inversion. Fixed cells were centrifuged,  
991 resuspended in PBS and settled on poly-L-lysine coated coverslips for 1 h (for  
992 cells to settle by gravity). Parasites were permeabilized in 0,2% Nonidet P-40 in  
993 PBS for 5 min and washed in PBS three times for 5 min each. Cells were blocked  
994 in 1% BSA, 25 mg/mL glycine, in PBST for 1 h and then incubated with anti-m<sup>6</sup>A  
995 antibody (Abcam) 1: 250 (4 µg/ml<sup>-1</sup> final concentration with 1% BSA in PBS) for  
996 3 h at room temperature. After washing cells three times with PBS for 15 min  
997 each with agitation, cells were incubated with secondary anti-rabbit antibody  
998 (Alexa Fluor 488, A11034) for 30 min (protected from light). At the end, cells were  
999 washed three times with PBS for 15 min each and DNA stained for 1 min with 1  
1000 µg/ml Hoechst. Slides were mounted using Vectashield.

1001

## 1002 **Image acquisition and analysis**

1003 Confocal images on fixed *T. brucei* parasites were acquired using a Zeiss  
1004 confocal Laser Point-Scanning (LSM) 880 Microscope equipped with the Zen 2.1  
1005 (black) software with a Plan Apochromat 63x NA 1.40 oil immersion DIC M27  
1006 Objective. The laser units used were a Diode 405-430 to excite the 405nm  
1007 wavelength (corresponding to Hoechst), and an Argon laser to excite the 488nm  
1008 wavelength (GaAsP detector 525/50 nm) (corresponding to AF488 used as a  
1009 secondary antibody for m<sup>6</sup>A labelling). Images were acquired in a two-track  
1010 mode. A pinhole diameter of 1AU for the 488 laser track was used. DIC images  
1011 in confocal mode were obtained using the 405nm laser line. A digital zoom of  
1012 1.2x was used for general quantification, or a digital zoom of 4x for sub-  
1013 localization analyses. For z-stack acquisition, on average 7-14 slices were  
1014 obtained to cover all parasite areas per field, with a stack slice of 0.3µm. Images  
1015 were acquired in multiple fields of view to enable quantification of at least 100  
1016 parasites per condition per experiment repeat. Images were analysed using  
1017 Fiji/ImageJ ([imagej.nih.gov/ij/](http://imagej.nih.gov/ij/)) for background correction, MFI determination and  
1018 segmentation analysis. 3D rendering and 3D quantifications of m<sup>6</sup>A were  
1019 performed using Imaris 9.1.0 (BitPlain). Statistical significance was determined  
1020 using GraphPad Prism (GraphPad Prism Software version 6). Statistical tests  
1021 used are mentioned in the corresponding Fig. legends. p<0.05 was considered  
1022 significant.

1023

1024
